# Supplementary material for: Laboratory evaluation of twelve portable devices for medicine quality screening
Source: PubMed Central journal article supplement (PMC8483346; doi:10.1371/journal.pntd.0009360), 2021-09-30
Supplement: pntd.0009360.s006.pdf [file pntd.0009360.s006.pdf]

**S6 Appendix. Field collected medicines tested and UPLC results.**

| Study Code (each blister of the sample) | Study Phase (RL, LE) | Brand name | API name | API Strength (mg) | Expiry Date (mm/yyyy) | Formulation | Types of packaging (T, O) | Origin - Quality of Sample | Mass Spectrometry Result | UPLC Result (%)                                 |
|-----------------------------------------|----------------------|------------|----------|-------------------|-----------------------|-------------|---------------------------|----------------------------|--------------------------|-------------------------------------------------|
| G071                                    | RL                   | Sulfatrim  | SMTM     | 400-80            | 04/2018               | Tab         | O                         | FC - Genuine               | N/A                      | 88 <sup>†</sup> -89 <sup>†</sup>                |
| G072                                    | RL                   | Sulfatrim  | SMTM     | 400-80            | 10/2017               | Tab         | O                         | FC - Genuine               | N/A                      | 93-95                                           |
| G080                                    | RL                   | Vactrim    | SMTM     | 400-80            | 04/2016               | Tab         | O                         | FC - Genuine               | N/A                      | 93-98                                           |
| G137                                    | RL                   | Ofloxin    | OFLO     | 200               | 03/2016               | Tab         | O                         | FC - Genuine               | N/A                      | 89.9 <sup>†</sup>                               |
| G259                                    | RL                   | Ofloxacin  | OFLO     | 200               | 01/2017               | Tab         | O                         | FC - Genuine               | N/A                      | 94.2                                            |
| G275                                    | RL                   | Oflocee    | OFLO     | 200               | 04/2018               | Tab         | O                         | FC - Genuine               | N/A                      | 89.1 <sup>†</sup> (1st test)<br>96 (2nd test)   |
| G278                                    | RL                   | Azithromax | AZITH    | 250               | 07/2017               | Tab         | O                         | FC - Genuine               | N/A                      | 102                                             |
| G281                                    | RL                   | Di-flo     | OFLO     | 200               | 02/2017               | Tab         | O                         | FC - Genuine               | N/A                      | 92.4                                            |
| G311                                    | RL                   | Strim-Side | SMTM     | 200               | 06/2017               | Tab         | O                         | FC - Genuine               | N/A                      | 96-93 (1st test)<br>99-99 (2nd test)            |
| G314                                    | RL                   | Vactrim    | SMTM     | 250               | 09/2016               | Tab         | O                         | FC - Genuine               | N/A                      | 97-98                                           |
| G317                                    | RL                   | Oflocee    | OFLO     | 200               | 12/2020               | Tab         | O                         | FC - Genuine               | N/A                      | 89.2 <sup>†</sup> (1st test)<br>92.3 (2nd test) |
| G318                                    | RL                   | Augmentin  | ACA      | 200               | 03/2018               | Tab         | T                         | FC - Genuine               | N/A                      | 92-96                                           |
| G324                                    | RL                   | Azithromax | AZITH    | 250               | 08/2018               | Tab         | O                         | FC - Genuine               | N/A                      | 95 (1st test)<br>98 (2nd test)                  |
| G337                                    | RL                   | Azithromax | AZITH    | 250               | 06/2018               | Tab         | O                         | FC - Genuine               | N/A                      | 97                                              |
| G344                                    | RL                   | Di-flo     | OFLO     | 200               | 03/2018               | Tab         | O                         | FC - Genuine               | N/A                      | 93.4                                            |

| Study Code (each blister of the sample) | Study Phase (RL, LE) | Brand name              | API name | API Strength (mg) | Expiry Date (mm/yyyy) | Formulation | Types of packaging (T, O) | Origin - Quality of Sample | Mass Spectrometry Result | UPLC Result (%)                                                                                                                           |
|-----------------------------------------|----------------------|-------------------------|----------|-------------------|-----------------------|-------------|---------------------------|----------------------------|--------------------------|-------------------------------------------------------------------------------------------------------------------------------------------|
| G388                                    | RL                   | Artemether-Lumefantrine | AL       | 200               | 09/2016               | Tab         | T                         | FC - Genuine               | N/A                      | 115 <sup>†</sup> -102                                                                                                                     |
| G419                                    | RL                   | Strim-Side              | SMTM     | 200               | 03/2019               | Tab         | O                         | FC - Genuine               | N/A                      | 96-98                                                                                                                                     |
| G426                                    | RL                   | Ofloxin                 | OFLO     | 200               | 01/2019               | Tab         | O                         | FC - Genuine               | N/A                      | 94.4                                                                                                                                      |
| G429                                    | RL                   | Biseptim                | SMTM     | 60                | 05/2018               | Tab         | O                         | FC - Genuine               | N/A                      | 96-100                                                                                                                                    |
| G432                                    | RL                   | Vactrim                 | SMTM     | 60                | 07/2018               | Tab         | O                         | FC - Genuine               | N/A                      | 94-135 <sup>†</sup> (1st test)<br>95-135 <sup>†</sup> (2nd test)<br>94-114 <sup>†</sup> (3rd test)<br>93-132 <sup>†</sup> (4th test)      |
| G435                                    | RL                   | Ofloxacin               | OFLO     | 200               | 08/2018               | Tab         | O                         | FC - Genuine               | N/A                      | 93.9 (1st test)<br>93.4 (2nd test)<br>97.4 (3rd test)                                                                                     |
| G437                                    | RL                   | Sulfatrim               | SMTM     | 200               | 09/2020               | Tab         | O                         | FC - Genuine               | N/A                      | 80 <sup>†</sup> -81 <sup>†</sup> (1st test)<br>84 <sup>†</sup> -86 <sup>†</sup> (2nd test)<br>87 <sup>†</sup> -89 <sup>†</sup> (3rd test) |
| G429                                    | RL                   | D-Artepp                | DHAP     | 250               | 09/2017               | Tab         | O                         | FC - Genuine               | N/A                      | 90.2-99.1                                                                                                                                 |
| G485                                    | RL                   | Azithromax              | AZITH    | 250               | 03/2019               | Tab         | O                         | FC - Genuine               | N/A                      | 99                                                                                                                                        |
| G526                                    | RL                   | D-Artepp                | DHAP     | 60                | 03/2017               | Tab         | O                         | FC - Genuine               | N/A                      | 86.9 <sup>†</sup> -101.3                                                                                                                  |
| G528                                    | LE                   | Cavumox 1G              | ACA      | 200               | 03/2018               | Tab         | O                         | FC - Genuine               | N/A                      | 101-104                                                                                                                                   |
| G529                                    | RL                   | Cavumox 1G              | ACA      | 250               | 02/2018               | Tab         | O                         | FC - Genuine               | N/A                      | 103-102                                                                                                                                   |
| G530                                    | RL                   | Cavumox 1G              | ACA      | 200               | 09/2017               | Tab         | O                         | FC - Genuine               | N/A                      | 100-100                                                                                                                                   |
| G533                                    | RL                   | AMK 1000 mg             | ACA      | 500               | 07/2018               | Tab         | T                         | FC - Genuine               | N/A                      | 100-77 <sup>†</sup> (1st test)<br>97-54 <sup>†</sup> (2nd test)                                                                           |
| G534                                    | RL                   | AMK 1000 mg             | ACA      | 250               | 04/2018               | Tab         | T                         | FC - Genuine               | N/A                      | 99-78 <sup>†</sup> (1st test)<br>99-52 <sup>†</sup> (2nd test)                                                                            |
| EP112/<br>EP113/<br>G563                | LE                   | Biseptim                | SMTM     | 200               | 08/2019               | Tab         | O                         | FC - Genuine               | N/A                      | 96-101                                                                                                                                    |

| Study Code (each blister of the sample) | Study Phase (RL, LE) | Brand name | API name | API Strength (mg) | Expiry Date (mm/yyyy) | Formulation | Types of packaging (T, O) | Origin - Quality of Sample | Mass Spectrometry Result | UPLC Result (%)                                       |
|-----------------------------------------|----------------------|------------|----------|-------------------|-----------------------|-------------|---------------------------|----------------------------|--------------------------|-------------------------------------------------------|
| G546                                    | LE                   | Di-flo     | OFLO     | 200               | 03/2018               | Tab         | O                         | FC - Genuine               | N/A                      | 96.2                                                  |
| G547                                    | RL                   | Artesun    | ART      | 60                | 06/2019               | Vial        | T                         | FC - Genuine               | N/A                      | 96.7                                                  |
| G548                                    | RL                   | Artesun    | ART      | 60                | 05/2019               | Vial        | T                         | FC - Genuine               | N/A                      | 97.2                                                  |
| G549                                    | LE                   | Artesun    | ART      | 60                | 05/2019               | Vial        | T                         | FC - Genuine               | N/A                      | 98.7                                                  |
| G550                                    | RL                   | D-Artepp   | DHAP     | 500               | 02/2018               | Tab         | O                         | FC - Genuine               | N/A                      | 91.4-98.4                                             |
| G551                                    | RL                   | D-Artepp   | DHAP     | 40-320            | 12/2017               | Tab         | O                         | FC - Genuine               | N/A                      | 87.3 <sup>†</sup> -103                                |
| EP024/<br>G552                          | LE                   | D-Artepp   | DHAP     | 40-320            | 01/2018               | Tab         | O                         | FC - Genuine               | N/A                      | 91.9-99.1                                             |
| EP091 to<br>EP100/<br>G556              | LE                   | Vactrim    | SMTM     | 400-80            | 08/2019               | Tab         | O                         | FC - Genuine               | N/A                      | 96-101                                                |
| EP009/<br>EP010/<br>G563                | LE                   | Augmentin  | ACA      | 500-125           | 02/2016               | Tab         | T                         | FC - Genuine               | N/A                      | 101-97                                                |
| G566                                    | LE                   | Di-flo     | OFLO     | 200               | 07/2018               | Tab         | O                         | FC - Genuine               | N/A                      | 96.9                                                  |
| EP044/<br>SPS14/<br>G569                | LE                   | Oflocee    | OFLO     | 200               | 03/2021               | Tab         | O                         | FC - Genuine               | N/A                      | 91.2 (1st test)<br>95.5 (2nd test)<br>96.2 (3rd test) |
| EP055/<br>EP056/<br>EP060/<br>G570      | LE                   | Ofloxacin  | OFLO     | 200               | 03/2020               | Tab         | O                         | FC - Genuine               | N/A                      | 92.4                                                  |
| EP129/<br>EP130/<br>G571                | LE                   | Sulfatrim  | SMTM     | 400-80            | 01/2022               | Tab         | O                         | FC - Genuine               | N/A                      | 98-99                                                 |
| GT-K19-<br>AD                           | LE                   | Coartem    | AL       | 20-120            | 01/2017               | Tab         | T                         | FC - Genuine               | N/A                      | 103-94                                                |
| GT-K20-<br>AD-3                         | RL                   | Coartem    | AL       | 20-120            | 05/2017               | Tab         | T                         | FC - Genuine               | N/A                      | 103-94                                                |

| Study Code (each blister of the sample) | Study Phase (RL, LE) | Brand name   | API name     | API Strength (mg) | Expiry Date (mm/yyyy) | Formulation | Types of packaging (T, O) | Origin - Quality of Sample | Mass Spectrometry Result                                                                                  | UPLC Result (%)                                                |
|-----------------------------------------|----------------------|--------------|--------------|-------------------|-----------------------|-------------|---------------------------|----------------------------|-----------------------------------------------------------------------------------------------------------|----------------------------------------------------------------|
| GT-K23-AD-3                             | RL                   | Coartem      | AL           | 20-120            | 06/2017               | Tab         | T                         | FC - Genuine               | N/A                                                                                                       | 106-93                                                         |
| LA 17-04                                | LE                   | AMK 1000 mg  | ACA          | 875-125           | 06/2018               | Tab         | T                         | FC - Genuine               | N/A                                                                                                       | 98-80 <sup>†</sup> (1st test)<br>96-64 <sup>†</sup> (2nd test) |
| LA13-02                                 | LE                   | Griseofulvin | Griseofulvin | 500               | 08/2015               | Tab         | T                         | FC - wrong API             | N/A                                                                                                       | No SMTM detected                                               |
| LA16-113                                | RL                   | Azithromax   | AZITH        | 250               | 06/2018               | Tab         | O                         | FC - Genuine               | N/A                                                                                                       | 97                                                             |
| LA16-122                                | LE                   | Ofloxin      | OFLO         | 200               | 12/2018               | Tab         | O                         | FC - Genuine               | N/A                                                                                                       | 102.8 (1st test)<br>102.0 (2nd test)                           |
| EP144/<br>LA16-150                      | LE                   | Azithromax   | AZITH        | 250               | 02/2018               | Tab         | O                         | FC - Genuine               | N/A                                                                                                       | 102                                                            |
| LA16-17                                 | RL                   | Strim-Side   | SMTM         | 400-80            | 06/2016               | Tab         | O                         | FC - Genuine               | N/A                                                                                                       | 99-98                                                          |
| LA16-180                                | RL                   | Ofloxin      | OFLO         | 200               | 07/2018               | Tab         | O                         | FC - Genuine               | N/A                                                                                                       | 92.8                                                           |
| LA16-202                                | RL                   | Augmentin    | ACA          | 500-125           | 04/2018               | Tab         | T                         | FC - Genuine               | N/A                                                                                                       | 99-102 (1st test)<br>99-102 (2nd test)                         |
| LA16-38                                 | RL                   | Strim-Side   | SMTM         | 400-80            | 05/2018               | Tab         | O                         | FC - Genuine               | N/A                                                                                                       | 100-102                                                        |
| LA16-41                                 | RL                   | Ofloxin      | OFLO         | 200               | 10/2017               | Tab         | O                         | FC - Genuine               | N/A                                                                                                       | 92.1                                                           |
| LA16-66                                 | RL                   | Azithromax   | AZITH        | 250               | 10/2018               | Tab         | O                         | FC - Genuine               | N/A                                                                                                       | 100                                                            |
| LA16-70                                 | LE                   | Strim-Side   | SMTM         | 400-80            | 01/2018               | Tab         | O                         | FC - Genuine               | N/A                                                                                                       | 91-92                                                          |
| LA17-03                                 | RL                   | Augmentin    | ACA          | 500-125           | 02/2019               | Tab         | T                         | FC - Genuine               | N/A                                                                                                       | 99-103                                                         |
| *LC15                                   | LE                   | Coartem      | AL           | 20-120            | 01/2016               | Tab         | T                         | FC – 0% API                | Major Components: Maltitol, Sucrose/Lactose, Glucose/Fructose, & Mannitol<br>Minor Components: Levamisole | N/A                                                            |
| *LC18                                   | LE                   | Coartem      | AL           | 20-120            | N/A                   | Tab         | T                         | FC – 0% API                | Major Components: Sucrose/Lactose & Glucose/Fructose<br>Minor Components: Levamisole                      | N/A                                                            |
| *LC5                                    | LE                   | Coartem      | AL           | 20-120            | 11/2015               | Tab         | T                         | FC –                       | Major Components: Chloramphenicol<br>Minor                                                                | N/A                                                            |

| Study Code (each blister of the sample) | Study Phase (RL, LE) | Brand name              | API name | API Strength (mg) | Expiry Date (mm/yyyy) | Formulation | Types of packaging (T, O) | Origin - Quality of Sample | Mass Spectrometry Result                                                                                   | UPLC Result (%) |
|-----------------------------------------|----------------------|-------------------------|----------|-------------------|-----------------------|-------------|---------------------------|----------------------------|------------------------------------------------------------------------------------------------------------|-----------------|
|                                         |                      |                         |          |                   |                       |             |                           | 0% API                     | Components: Levamisole & Sildenafil                                                                        |                 |
| *LC9                                    | LE                   | Coartem                 | AL       | 20-120            | 11/2015               | Tab         | T                         | FC – 0% API                | Major Components: Ciprofloxacin<br>Minor Components: Levamisole & Sildenafil                               | N/A             |
| MM16-21                                 | LE/RL                | Artemether-Lumefantrine | AL       | 20-120            | 07/2017               | Tab         | T                         | FC - Genuine               | N/A                                                                                                        | 101-93          |
| *N1                                     | LE                   | Coartem                 | AL       | 20-120            | 01/2016               | Tab         | T                         | FC – 0% API                | Major Components: Mannitol, Sucrose/Lactulose, & Glucose/Fructose<br>Minor Components: Maltitol            | N/A             |
| *N15                                    | LE                   | Coartem                 | AL       | 20-120            | 01/2016               | Tab         | T                         | FC – 0% API                | Major Components: Mannitol, Sucrose/Lactulose, & Glucose/Fructose<br>Minor Components: Maltitol            | N/A             |
| *N19                                    | LE                   | Coartem                 | AL       | 20-120            | 01/2016               | Tab         | T                         | FC – 0% API                | Major Components: Sucrose/Lactulose, Glucose/Fructose, & Mannitol                                          | N/A             |
| *N3                                     | LE                   | Coartem                 | AL       | 20-120            | 01/2016               | Tab         | T                         | FC - wrong API             | Major Components: Sucrose/Lactulose & Glucose/Fructose<br>Minor Components: Levamisole                     | N/A             |
| *N34                                    | LE                   | Coartem                 | AL       | 20-120            | 11/2015               | Tab         | T                         | FC - wrong API             | Major Components: Chloramphenicol<br>Minor Components: Sildenafil                                          | N/A             |
| *N36                                    | LE                   | Coartem                 | AL       | 20-120            | 11/2015               | Tab         | T                         | FC - wrong API             | Major Components: Ciprofloxacin<br>Minor Components: Sildenafil                                            | N/A             |
| *N5                                     | LE                   | Coartem                 | AL       | 20-120            | 11/2015               | Tab         | T                         | FC - wrong API             | Major Components: Ciprofloxacin<br>Minor Components: Sildenafil                                            | N/A             |
| *S0043                                  | LE                   | Artemether-Lumefantrine | AL       | 20-120            | 06/2016               | Tab         | T                         | FC – 0% API                | Major Components: Sucrose/Lactulose, Glucose/Fructose, Mannitol, and m/z 338<br>Minor Components: Maltitol | N/A             |

\* Sample not tested by UPLC but underwent mass spectrometry as part of another study - none of the correct APIs as stated on the packaging were present

ACA: Amoxicillin-clavulanic acid; AL: Artemether-lumefantrine; API: Active Pharmaceutical Ingredient; ART: Artesunate; AZITH: Azithromycin;

DHAP: Dihydroartemisinin-piperazine; FC: Field-collected; LE: Laboratory evaluation; OFLO: Ofloxacin; O: Opaque packaging; RL: Reference library; SM: Simulated medicines; SMTM: Sulfamethoxazole-trimethoprim; Tab: Tablets; T: transparent packaging ; Vial: Vials (powder bottle for injection).

† Out of specification according to the 90-110% range considered in the present study.

N/A: Not applicable or lack of information.
