# Supplementary material for: Laboratory evaluation of twelve portable devices for medicine quality screening
Source: PubMed Central journal article supplement (PMC8483346; doi:10.1371/journal.pntd.0009360), 2021-09-30
Supplement: pntd.0009360.s007.pdf [file pntd.0009360.s007.pdf]

## S7 Appendix. Simulated Medicine Preparations

|                                                                   |   |
|-------------------------------------------------------------------|---|
| Text S7 A. Details about simulated medicine preparation .....     | 1 |
| Table S7 A. Formulations of simulated medicine preparations ..... | 2 |

### Text S7 A. Details about simulated medicine preparation

Two types of simulated medicines were developed: one set utilized pure API stocks purchased from TCI Chemical, and the other set was derived from genuine medicines that were crushed and re-pressed, as described in the table below (Table S7.1). The crushed and re-pressed samples were needed because of the large volume of simulated medicines necessary for significant statistics and to test a wide variety of APIs. The high cost of pure APIs also made re-crushing genuine samples the only feasible choice.

For the set of medicines that were derived from pure APIs, the ratios of API to excipient were derived from the following genuine medicines: Ofloxin 200 (OFLO), Vactrim (SMTM), Artesun (ART), and Azithromax (AZITH). Every simulated sample was prepared with one of each of the following (Table S7.1): cellulose, lactose, and starch. For example, there were three types of samples of simulated good quality OFLO where each sample contained one of the mentioned excipients. The simulated good quality samples with the re-crushed genuine medicines and ART did not contain any excipient and there was only one sample per API. To decrease the API concentration for the substandards of the re-crushed genuine medicines and ART, there were three samples at each API concentration, each sample diluted with one of the mentioned excipients. All pressed samples, except for powdered ART and the good quality re-crushed samples, also contained 2% by mass of magnesium stearate to help lubricate the sample when being pressed for easier removal.

All simulated medicines followed the same protocol for preparation, except for ART which is distributed in powder form. All the simulated sample ingredients that included the API, excipient, magnesium stearate, and crushed medicine powder, where applicable, were weighed on a scale to make approximately 15 tablets and placed into small, individual polyethylene sample bags and sealed. The ingredients were thoroughly mixed by massaging the sealed bag by hand until a homogeneous mixture appeared in the bag and screened through a mesh strainer to remove any clumps. Next, samples were weighed out in 100-mg aliquots. The aliquots were immediately pressed into 6-mm-diameter tablets, approximately 3- to 4-mm tall. For ART, samples were weighed out into 60-mg aliquots and placed into 6-mL, clear glass scintillation vials and sealed with a screw top. Tablet samples were stored in 6-mL amber glass scintillation vials and sealed with a screw cap until analysis. All samples were stored in a 4°C refrigerator.

**Table S7 A. Formulations of simulated medicine preparations**

| <u>Sample Category</u>        | <u>Active Ingredient</u>       | <u>API Source</u> | <u>Pure Active Ingredient (%)</u> | <u>Crushed Genuine Medicine (%)</u> | <u>Excipient (%)</u> | <u>Lubricant* (%)</u> | <u>Number of Unique Samples†</u> |
|-------------------------------|--------------------------------|-------------------|-----------------------------------|-------------------------------------|----------------------|-----------------------|----------------------------------|
| <b>Good Quality</b>           | Ofloxacin                      | TCI Chemical      | 65                                |                                     | 33                   | 2                     | 3                                |
|                               | Sulfamethoxazole/Trimethoprim  | TCI Chemical      | 80/16                             |                                     | 2                    | 2                     | 3                                |
|                               | Azithromycin                   | TCI Chemical      | 73                                |                                     | 25                   | 2                     | 3                                |
|                               | Artesunate                     | TCI Chemical      | 100                               |                                     | 0                    | 0                     | 1                                |
|                               | Amoxicillin/Clavulanic Acid    | AMK 1000mg        |                                   | 100                                 | 0                    | 0                     | 1                                |
|                               | Dihydroartemisinin/Piperaquine | D-Artepp          |                                   | 100                                 | 0                    | 0                     | 1                                |
|                               | Artemether/Lumefantrine        | Coartem           |                                   | 100                                 | 0                    | 0                     | 1                                |
| <b>Substandard at 80%API</b>  | Ofloxacin                      | TCI Chemical      | 52                                |                                     | 46                   | 2                     | 3                                |
|                               | Sulfamethoxazole/Trimethoprim  | TCI Chemical      | 64/13                             |                                     | 21                   | 2                     | 3                                |
|                               | Azithromycin                   | TCI Chemical      | 58                                |                                     | 40                   | 2                     | 3                                |
|                               | Artesunate                     | TCI Chemical      | 80                                |                                     | 20                   | 0                     | 3                                |
|                               | Amoxicillin/Clavulanic Acid    | AMK® 1000mg       |                                   | 80                                  | 18                   | 2                     | 3                                |
|                               | Dihydroartemisinin/Piperaquine | D-Artepp          |                                   | 80                                  | 18                   | 2                     | 3                                |
|                               | Artemether/Lumefantrine        | Coartem           |                                   | 80                                  | 18                   | 2                     | 3                                |
| <b>Substandard at 50% API</b> | Ofloxacin                      | TCI Chemical      | 33                                |                                     | 65                   | 2                     | 3                                |
|                               | Sulfamethoxazole/Trimethoprim  | TCI Chemical      | 40/8                              |                                     | 50                   | 2                     | 3                                |
|                               | Azithromycin                   | TCI Chemical      | 36                                |                                     | 62                   | 2                     | 3                                |
|                               | Artesunate                     | TCI Chemical      | 50                                |                                     | 50                   | 0                     | 3                                |
|                               | Amoxicillin/Clavulanic Acid    | AMK 1000mg        | 50                                |                                     | 48                   | 2                     | 3                                |
|                               | Dihydroartemisinin/Piperaquine | D-Artepp          | 50                                |                                     | 48                   | 2                     | 3                                |
|                               | Artemether/Lumefantrine        | Coartem           | 50                                |                                     | 48                   | 2                     | 3                                |
| <b>Falsified</b>              | Acetaminophen                  | TCI Chemical      | 50                                |                                     | 48                   | 2                     | 3                                |
|                               | Excipient Only                 | TCI Chemical      | 0                                 |                                     | 98                   | 2                     | 3                                |

\* Magnesium stearate

† 1 = only one sample that contains the active ingredient and has no additional excipient; 3 = three samples, the active ingredient plus one of the three excipients: cellulose, lactose, & starch
