# Supplementary material for: Laboratory evaluation of twelve portable devices for medicine quality screening
Source: PubMed Central journal article supplement (PMC8483346; doi:10.1371/journal.pntd.0009360), 2021-09-30
Supplement: pntd.0009360.s010.pdf [file pntd.0009360.s010.pdf]

**S10 Appendix. US, international, Chinese, and British pharmacopeial standards for the studied APIs.**

| <b><i>API</i></b>                              | <b><i><u>US<br/>Pharmacopeia<br/>2017</u></i></b> | <b><i><u>International<br/>Pharmacopeia<br/>2018</u></i></b> | <b><i><u>Chinese<br/>Pharmacopeia<br/>2010</u></i></b> | <b><i><u>British<br/>Pharmacopeia<br/>2018</u></i></b> |
|------------------------------------------------|---------------------------------------------------|--------------------------------------------------------------|--------------------------------------------------------|--------------------------------------------------------|
| <b>Artesunate (IV/IM powder)</b>               | N/A                                               | 90-110%                                                      | 93-110%                                                | N/A                                                    |
| <b>Amoxicillin/Clavulanic acid (tablet)</b>    | 90-110%                                           | 90-120% <sup>†</sup>                                         | 90-120%                                                | 90-105%                                                |
| <b>Azithromycin (tablet)</b>                   | 90-110%                                           | N/A                                                          | 90-110%                                                | 95-105%                                                |
| <b>Sulfamethoxazole/Trimethoprim (tablet)</b>  | 93-107%                                           | 90-110%                                                      | N/A                                                    | 92.5-107.5%                                            |
| <b>Ofloxacin (tablet)</b>                      | 90-110%                                           | N/A                                                          | 90-110%                                                | N/A                                                    |
| <b>Dihydroartemisinin/Piperaquine (tablet)</b> | 95-105% <sup>*</sup>                              | N/A                                                          | N/A                                                    | N/A                                                    |
| <b>Artemether/Lumefantrine (tablet)</b>        | N/A                                               | 90-110%                                                      | N/A                                                    | N/A                                                    |

\* USP monograph, 2013 - Dihydroartemisinin/Piperaquine tablets monograph was not available in USP 2017

<sup>†</sup> Draft in preparation
