# Supplementary material for: Laboratory evaluation of twelve portable devices for medicine quality screening
Source: PubMed Central journal article supplement (PMC8483346; doi:10.1371/journal.pntd.0009360), 2021-09-30
Supplement: pntd.0009360.s011.pdf [file pntd.0009360.s011.pdf]

**S11 Appendix. API vs. formulation screening.**

| <u><i>Specific API-detection</i></u> | <u><i>Chemical formulation screening</i></u> |
|--------------------------------------|----------------------------------------------|
| PharmaChk                            | Neospectra 2.5                               |
| C-Vue                                | NIR-S-G1                                     |
| PADs                                 | 4500a FTIR                                   |
| RDTs                                 | MicroPHAZIR RX                               |
| Minilab                              | Progeny                                      |
| QDa                                  | Truscan RM                                   |
