# Supplementary material for: Laboratory evaluation of twelve portable devices for medicine quality screening
Source: PubMed Central journal article supplement (PMC8483346; doi:10.1371/journal.pntd.0009360), 2021-09-30
Supplement: pntd.0009360.s012.pdf [file pntd.0009360.s012.pdf]

**S12 Appendix. Mini-lab thin layer chromatography kit results**

Table S12 A. Mini-lab thin layer chromatography kit detailed performance breakdown ..... 1

Table S12 B. Mini-lab thin layer chromatography kit evaluation summary. .... 2

**Table S12 A. Mini-lab thin layer chromatography kit detailed performance breakdown**

| <u>Samples</u>                              | <b>Good-quality samples available for specificity calculation: n=24</b> |                                       |                                                                                |                                                                                 |
|---------------------------------------------|-------------------------------------------------------------------------|---------------------------------------|--------------------------------------------------------------------------------|---------------------------------------------------------------------------------|
|                                             | <b><u>0% API and wrong API samples</u></b><br><b><u>(n=53)</u></b>      |                                       | <b><u>50% and 80%</u></b><br><b><u>API samples</u></b><br><b><u>(n=42)</u></b> | <b><u>All poor quality</u></b><br><b><u>samples</u></b><br><b><u>(n=95)</u></b> |
|                                             | <b>Sensitivity</b><br><b>(95% CI)</b>                                   | <b>Specificity</b><br><b>(95% CI)</b> | <b>Sensitivity</b><br><b>(95% CI)</b>                                          | <b>Sensitivity</b><br><b>(95% CI)</b>                                           |
| <i>Total, not through packaging (n=119)</i> | 100 (93.3-100)                                                          | 100 (85.8-100)                        | 59.5 (43.3-74.4)                                                               | 82.1 (72.9-89.2)                                                                |
| <i>Antimalarials (n=51)</i>                 | 100 (87.7-100)                                                          | 100 (47.8-100)                        | 66.7 (41-86.7)                                                                 | 87 (73.7-95.1)                                                                  |
| AL (n=24)                                   | 100 (79.4-100)                                                          | 100 (15.8-100)                        | 66.7 (22.3-95.7)                                                               | 90.9 (70.8-98.9)                                                                |
| ART (n=14)                                  | 100 (54.1-100)                                                          | 100 (15.8-100)                        | 83.3 (35.9-99.6)                                                               | 91.7 (61.5-99.8)                                                                |
| DHAP (n=13)                                 | 100 (54.1-100)                                                          | 100 (2.5-100)                         | 50 (11.8-88.2)                                                                 | 75 (42.8-94.5)                                                                  |
| <i>Antibiotics (n=68)</i>                   | 100 (86.3-100)                                                          | 100 (82.4-100)                        | 54.2 (32.8-74.4)                                                               | 77.6 (63.4-88.2)                                                                |
| ACA (n=15)                                  | 100 (54.1-100)                                                          | 100 (29.2-100)                        | 83.3 (35.9-99.6)                                                               | 91.7 (61.5-99.8)                                                                |
| AZITH (n=16)                                | 100 (54.1-100)                                                          | 100 (39.8-100)                        | 33.3 (4.3-77.7)                                                                | 66.7 (34.9-90.1)                                                                |
| OFLO (n=19)                                 | 100 (54.1-100)                                                          | 100 (59-100)                          | 50 (11.8-88.2)                                                                 | 75 (42.8-94.5)                                                                  |
| SMTM (n=18)                                 | 100 (59-100)                                                            | 100 (47.8-100)                        | 50 (11.8-88.2)                                                                 | 76.9 (46.2-95)                                                                  |

**Table S12 B. Mini-lab thin layer chromatography kit evaluation summary.**

|                                            | <i>Samples</i>                                                                                                                                                                                                                                                                                                                                                                            | <i>Sensitivity<br/>(95% CI)*</i> | <i>Specificity<br/>(95% CI)*</i> | <i>Comments</i> |
|--------------------------------------------|-------------------------------------------------------------------------------------------------------------------------------------------------------------------------------------------------------------------------------------------------------------------------------------------------------------------------------------------------------------------------------------------|----------------------------------|----------------------------------|-----------------|
| <b>Sensitivity and Specificity Results</b> | <i>0% and wrong API</i>                                                                                                                                                                                                                                                                                                                                                                   | 100 (93.3-100)                   | 100 (85.8-100)                   | N/A             |
|                                            | <i>50% and 80% API†</i>                                                                                                                                                                                                                                                                                                                                                                   | 59.5 (43.3-74.4)                 |                                  |                 |
|                                            | <i>All poor quality samples</i>                                                                                                                                                                                                                                                                                                                                                           | 82.1 (72.9-89.2)                 |                                  |                 |
| <b>Strengths and Limitations</b>           | <p><i>Strengths:</i><br/>                     -High accuracy to identify samples with no or wrong API.<br/>                     -Good sensitivity in identifying 50% API samples.</p> <p><i>Limitations:</i><br/>                     -Most 80% API samples incorrectly identified as genuine.<br/>                     -Only three 80% API samples correctly identified as failing.†</p> |                                  |                                  |                 |
| <b>User Satisfaction</b>                   | <p><i>Plus:</i><br/>                     All equipment necessary provided; well described, detailed and illustrated protocols; mains electricity not required.</p> <p><i>Minus:</i><br/>                     Safety hazards and waste needed because of chemical reagents; destroys sample; large and heavy; sample testing requires a relatively long time.</p>                          |                                  |                                  |                 |
| <b>Comparative Evaluation</b>              | <p>-No significant differences in sensitivity compared to other devices to identify 0% and wrong API samples. Higher specificity than the C-Vue liquid chromatograph.<br/>                     -Longest total time per sample compared to other devices.<br/>                     -Several samples of the same API can be run simultaneously.</p>                                         |                                  |                                  |                 |

\* Sensitivity and specificity for quality assessment of the dosage unit not through the packaging.

† Because TLC experiments of the samples tested are run together with 80% and 100% API reference standard solutions, the Mini-lab TLC methods allow a range of 80 to 100 % API as the lower and higher acceptable limits. These results should be thus interpreted with caution.
