# Supplementary material for: Laboratory evaluation of twelve portable devices for medicine quality screening
Source: PubMed Central journal article supplement (PMC8483346; doi:10.1371/journal.pntd.0009360), 2021-09-30
Supplement: pntd.0009360.s022.pdf [file pntd.0009360.s022.pdf]

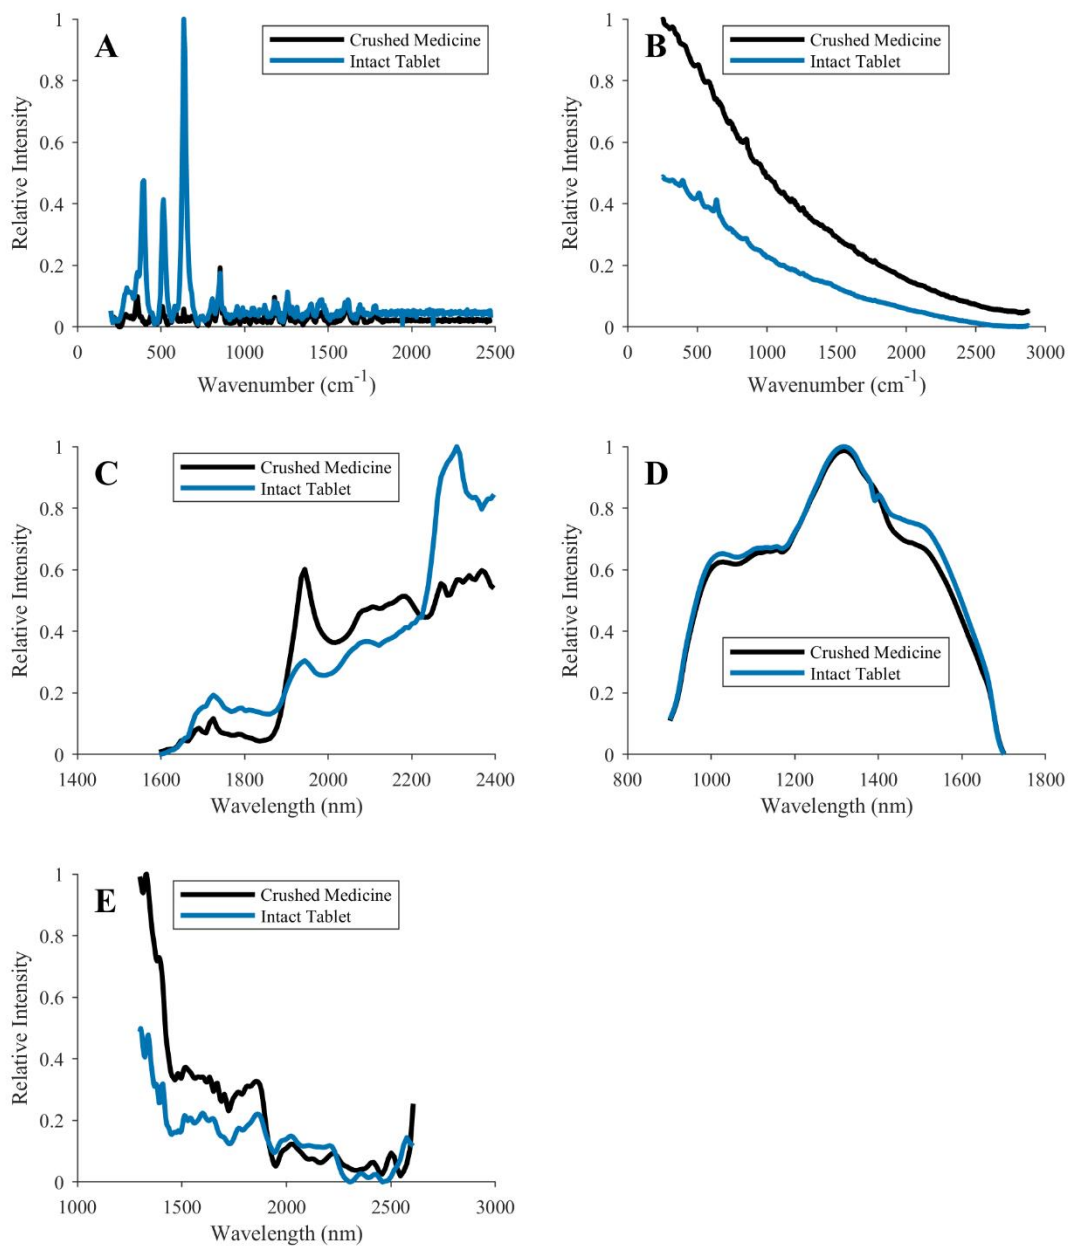

**S22 Appendix. Intact vs. crushed ACA tablet analysis by Raman and NIR spectrometers.**

Spectral comparisons of a field collected sample of AMK 1000 mg (a co-formulation of amoxicillin and clavulanic acid) are shown with the (A) Progeny, (B) Truscan RM, (C) MicroPHAZIR RX, (D) NIR-S-G1, and (E) Neospectra 2.5 spectrometers. The spectra in blue are scans of an intact tablet of AMK 1000 mg. The spectra in black are scans of the powder from a crushed AMK 1000 mg tablet.
