# Supplementary material for: Laboratory evaluation of twelve portable devices for medicine quality screening
Source: PubMed Central journal article supplement (PMC8483346; doi:10.1371/journal.pntd.0009360), 2021-09-30
Supplement: pntd.0009360.s023.pdf [file pntd.0009360.s023.pdf]

## S23 Appendix. Truscan RM Raman spectrometer results

Table S23 A. Truscan RM Raman spectrometer detailed performance breakdown. .... 1

Table S23 B. Truscan RM Raman spectrometer evaluation summary. .... 2

**Table S23 A. Truscan RM Raman spectrometer detailed performance breakdown.**

| <u>Samples</u>                                     | <b>Good quality samples available for specificity calculation: n=22</b> |                                       |                                                                                |                                                                                 |
|----------------------------------------------------|-------------------------------------------------------------------------|---------------------------------------|--------------------------------------------------------------------------------|---------------------------------------------------------------------------------|
|                                                    | <b><u>0% and wrong API samples</u></b><br><b><u>(n=47)</u></b>          |                                       | <b><u>50% and 80%</u></b><br><b><u>API samples</u></b><br><b><u>(n=36)</u></b> | <b><u>All poor quality</u></b><br><b><u>samples</u></b><br><b><u>(n=83)</u></b> |
|                                                    | <b>Sensitivity</b><br><b>(95% CI)</b>                                   | <b>Specificity</b><br><b>(95% CI)</b> | <b>Sensitivity</b><br><b>(95% CI)</b>                                          | <b>Sensitivity</b><br><b>(95% CI)</b>                                           |
| <b><i>Total, not through packaging (n=105)</i></b> | 100 (92.5-100)                                                          | 100 (84.6-100)                        | 22.2 (10.1-39.2)                                                               | 66.3 (55.1-76.3)                                                                |
| <b><i>Antimalarials (n=37)</i></b>                 | 100 (84.6-100)                                                          | 100 (29.2-100)                        | 41.7 (15.2-72.3)                                                               | 79.4 (62.1-91.3)                                                                |
| AL (n=24)                                          | 100 (79.4-100)                                                          | 100 (15.8-100)                        | 0 (0-45.9)                                                                     | 72.7 (49.8-89.3)                                                                |
| ART (n=0)*                                         | N/A                                                                     | N/A                                   | N/A                                                                            | N/A                                                                             |
| DHAP (n=13)                                        | 100 (54.1-100)                                                          | 100 (2.5-100)                         | 83.3 (35.9-99.6)                                                               | 91.7 (61.5-99.8)                                                                |
| <b><i>Antibiotics (n=68)</i></b>                   | 100 (86.3-100)                                                          | 100 (82.4-100)                        | 12.5 (2.7-32.4)                                                                | 57.1 (42.2-71.2)                                                                |
| ACA (n=15)                                         | 100 (54.1-100)                                                          | 100 (29.2-100)                        | 0 (0-45.9)                                                                     | 50 (21.1-78.9)                                                                  |
| AZITH (n=16)                                       | 100 (54.1-100)                                                          | 100 (39.8-100)                        | 50 (11.8-88.2)                                                                 | 75 (42.8-94.5)                                                                  |
| OFLO (n=19)                                        | 100 (54.1-100)                                                          | 100 (59-100)                          | 0 (0-45.9)                                                                     | 50 (21.1-78.9)                                                                  |
| SMTM (n=18)                                        | 100 (59-100)                                                            | 100 (47.8-100)                        | 0 (0-45.9)                                                                     | 53.8 (25.1-80.8)                                                                |

| <u>Samples</u>                                 | <b>Good quality samples available for specificity calculation: n=2</b> |                                       |                                                                               |                                                                |
|------------------------------------------------|------------------------------------------------------------------------|---------------------------------------|-------------------------------------------------------------------------------|----------------------------------------------------------------|
|                                                | <b><u>0% and wrong API samples</u></b><br><b><u>(n=10)</u></b>         |                                       | <b><u>50% and 80%</u></b><br><b><u>API samples</u></b><br><b><u>(n=0)</u></b> | <b><u>All poor quality</u></b><br><b><u>samples (n=10)</u></b> |
|                                                | <b>Sensitivity</b><br><b>(95% CI)</b>                                  | <b>Specificity</b><br><b>(95% CI)</b> | <b>Sensitivity</b><br><b>(95% CI)</b>                                         | <b>Sensitivity</b><br><b>(95% CI)</b>                          |
| <b><i>Total, through packaging (n=12)†</i></b> | 100 (69.2-100)                                                         | 100 (15.8-100)                        | N/A                                                                           | 100 (69.2-100)                                                 |

| <u>Samples</u>                                             | <b>Good quality samples available for specificity calculation: n=1</b> |                                       |                                                                               |                                                                                 |
|------------------------------------------------------------|------------------------------------------------------------------------|---------------------------------------|-------------------------------------------------------------------------------|---------------------------------------------------------------------------------|
|                                                            | <b><u>0% and wrong API samples</u></b><br><b><u>(n=6)</u></b>          |                                       | <b><u>50% and 80%</u></b><br><b><u>API samples</u></b><br><b><u>(n=6)</u></b> | <b><u>All poor quality</u></b><br><b><u>samples</u></b><br><b><u>(n=12)</u></b> |
|                                                            | <b>Sensitivity</b><br><b>(95% CI)</b>                                  | <b>Specificity</b><br><b>(95% CI)</b> | <b>Sensitivity</b><br><b>(95% CI)</b>                                         | <b>Sensitivity</b><br><b>(95% CI)</b>                                           |
| <b><i>Total, through replacement packaging (n=13)‡</i></b> | 100 (54.1-100)                                                         | 100 (2.5-100)                         | 33.3 (4.3-77.7)                                                               | 66.7 (34.9-90.1)                                                                |

\* Not applicable – insufficient amount of powder (60 mg) to be tested directly with the device - ART samples were thus scanned through replacement packaging;

† Packaging available with medicine (blister or glass vial for one field collected ART sample) ;

‡ Insufficient genuine parenteral artesunate vials were available for testing and therefore borosilicate replacement vials were used.

**Table S23 B. Truscan RM Raman spectrometer evaluation summary.**

|                                            | <i>Samples</i>                                                                                                                                                                                                                                                                                                                                                                                                                                                                                                                                                                                                                                                                                                                                 | <i>Sensitivity<br/>(95% CI)*</i> | <i>Specificity<br/>(95% CI)*</i> | <i>Comments</i>                                                                                                      |
|--------------------------------------------|------------------------------------------------------------------------------------------------------------------------------------------------------------------------------------------------------------------------------------------------------------------------------------------------------------------------------------------------------------------------------------------------------------------------------------------------------------------------------------------------------------------------------------------------------------------------------------------------------------------------------------------------------------------------------------------------------------------------------------------------|----------------------------------|----------------------------------|----------------------------------------------------------------------------------------------------------------------|
| <b>Sensitivity and Specificity Results</b> | <i>0% and wrong API</i>                                                                                                                                                                                                                                                                                                                                                                                                                                                                                                                                                                                                                                                                                                                        | 100 (92.5-100)                   | 100 (84.6-100)                   | Developing API-specific algorithms could improve device performance to identify poor quality medicines with low API. |
|                                            | <i>50% and 80% API<sup>†</sup></i>                                                                                                                                                                                                                                                                                                                                                                                                                                                                                                                                                                                                                                                                                                             | 22.2 (10.1-39.2)                 |                                  |                                                                                                                      |
|                                            | <i>All poor quality samples</i>                                                                                                                                                                                                                                                                                                                                                                                                                                                                                                                                                                                                                                                                                                                | 66.3 (55.1-76.3)                 |                                  |                                                                                                                      |
| <b>Strengths and Limitations</b>           | <p><i>Strengths:</i></p> <ul style="list-style-type: none"> <li>-High accuracy in identifying samples with no or wrong API.</li> <li>-Good performance through packaging (except through glass vial for ART samples) for 0% and wrong API identification.</li> <li>-Good performance to identify 80% API DHAP samples.<sup>†</sup></li> </ul> <p><i>Limitations:</i></p> <ul style="list-style-type: none"> <li>-Poor sensitivity to identify 50% API samples (except AZITH samples, 2 of the 3 DHAP and 2 of the 3 ART samples).<sup>†</sup></li> <li>-Poor sensitivity to identify 80% API (except DHAP samples).<sup>†</sup></li> </ul>                                                                                                     |                                  |                                  |                                                                                                                      |
| <b>User Satisfaction</b>                   | <p><i>Plus:</i></p> <p>Several batches of the same reference sample can be added to the reference library to consider variability; easy to use for end user, step-by-step screen instructions; when sample fails to match the selected reference library spectrum, the whole library of spectra is searched by the device looking for the closest match; computer not needed for field-testing.</p> <p><i>Minus:</i></p> <p>Reference library creation cannot be accomplished to the device itself; initial set-up of master computer and software packages difficult, requiring IT skills; difficulties to scroll down with buttons when looking for the reference library; tablet holder not adapted to larger or smaller sized tablets;</p> |                                  |                                  |                                                                                                                      |
| <b>Comparative Evaluation</b>              | <ul style="list-style-type: none"> <li>-No significant differences in sensitivity compared to other devices to identify 0% and wrong API samples; higher specificity than the C-Vue liquid chromatograph.</li> <li>-Same total time per sample as Progeny spectrometer but slower than the NIRscan spectrometer (faster than 4500a FTIR spectrometer).</li> </ul>                                                                                                                                                                                                                                                                                                                                                                              |                                  |                                  |                                                                                                                      |

\* Sensitivity and specificity for quality assessment of the dosage unit not through the packaging.

<sup>†</sup> Algorithms should be developed on an API basis to enhance detection of lower API samples (this was not performed in the present study; therefore, these results should be interpreted with caution)
