# Supplementary material for: Laboratory evaluation of twelve portable devices for medicine quality screening
Source: PubMed Central journal article supplement (PMC8483346; doi:10.1371/journal.pntd.0009360), 2021-09-30
Supplement: pntd.0009360.s024.pdf [file pntd.0009360.s024.pdf]

**S24 Appendix. C-Vue liquid chromatograph results**

Table S24 A. C-Vue liquid chromatograph detailed performance breakdown..... 1

Table S24 B. C-Vue liquid chromatograph evaluation summary..... 2

**Table S24 A. C-Vue liquid chromatograph detailed performance breakdown.**

| <b>Samples</b>                                 | <b>Good quality samples available for specificity calculation: n=22</b> |                                 |                                               |                                                |
|------------------------------------------------|-------------------------------------------------------------------------|---------------------------------|-----------------------------------------------|------------------------------------------------|
|                                                | <b>0% and wrong API samples<br/>(n=19)</b>                              |                                 | <b>50% and 80%<br/>API samples<br/>(n=18)</b> | <b>All poor quality<br/>samples<br/>(n=37)</b> |
|                                                | <b>Sensitivity<br/>(95% CI)</b>                                         | <b>Specificity<br/>(95% CI)</b> | <b>Sensitivity<br/>(95% CI)</b>               | <b>Sensitivity<br/>(95% CI)</b>                |
| <b>Total, not through<br/>packaging (n=52)</b> | 100 (82.4-100)                                                          | 60 (32.3-83.7)                  | 100 (81.5-100)                                | 100 (90.5-100)                                 |
| <b>Antimalarials<br/>(n=0)</b>                 | N/A                                                                     | N/A                             | N/A                                           | N/A                                            |
| AL (n=0)                                       | N/A                                                                     | N/A                             | N/A                                           | N/A                                            |
| ART (n=0)                                      | N/A                                                                     | N/A                             | N/A                                           | N/A                                            |
| DHAP (n=0)                                     | N/A                                                                     | N/A                             | N/A                                           | N/A                                            |
| <b>Antibiotics (n=52)</b>                      | 100 (82.4-100)                                                          | 60 (32.3-83.7)                  | 100 (81.5-100)                                | 100 (90.5-100)                                 |
| ACA (n=15)                                     | 100 (54.1-100)                                                          | 0 (0-70.8)                      | 100 (54.1-100)                                | 100 (73.5-100)                                 |
| AZITH (n=0)                                    | N/A                                                                     | N/A                             | N/A                                           | N/A                                            |
| OFLO (n=19)                                    | 100 (54.1-100)                                                          | 100 (59-100)                    | 100 (54.1-100)                                | 100 (73.5-100)                                 |
| SMTM (n=18)                                    | 100 (59-100)                                                            | 40 (5.3-85.3)                   | 100 (54.1-100)                                | 100 (75.3-100)                                 |

**Table S24 B. C-Vue liquid chromatograph evaluation summary.**

|                                            | <i>Samples</i>                                                                                                                                                                                                                                                                                                                                              | <i>Sensitivity<br/>(95% CI)*</i> | <i>Specificity<br/>(95% CI)*</i> | <i>Comments</i>                                   |
|--------------------------------------------|-------------------------------------------------------------------------------------------------------------------------------------------------------------------------------------------------------------------------------------------------------------------------------------------------------------------------------------------------------------|----------------------------------|----------------------------------|---------------------------------------------------|
| <b>Sensitivity and Specificity Results</b> | <i>0% and wrong API</i>                                                                                                                                                                                                                                                                                                                                     | 100<br>(82.4-100)                | 60.0<br>(32.3-83.7)              | Performance may be affected by sample extraction. |
|                                            | <i>50% and 80% API</i>                                                                                                                                                                                                                                                                                                                                      | 100<br>(81.5-100)                |                                  |                                                   |
|                                            | <i>All poor quality samples</i>                                                                                                                                                                                                                                                                                                                             | 100<br>(90.5-100)                |                                  |                                                   |
| <b>Strengths and Limitations</b>           | <p><i>Strengths:</i><br/>                     -High accuracy in identifying samples with no or wrong API.<br/>                     -Correct identification of all 50% and 80% API medicines, with quantitation of API.</p> <p><i>Limitations:</i><br/>                     -Limited performance to identify genuine samples of co-formulated medicines.</p> |                                  |                                  |                                                   |
| <b>User Satisfaction</b>                   | <p><i>Plus:</i><br/>                     Intuitive system for experienced analysts; no reference library creation required.</p> <p><i>Minus:</i><br/>                     Intensive operation and set-up; two computers required to run dual detector set-up; destroys sample; chemicals required; requires experienced end-users.</p>                      |                                  |                                  |                                                   |
| <b>Comparative Evaluation</b>              | No significant differences in sensitivity compared to other devices to identify 0% and wrong API samples; lower specificity than all other devices*                                                                                                                                                                                                         |                                  |                                  |                                                   |

\* Pair-wise comparisons with PharmaChk and RDT could not be performed, no overlapping API.
