# Supplementary material for: Laboratory evaluation of twelve portable devices for medicine quality screening
Source: PubMed Central journal article supplement (PMC8483346; doi:10.1371/journal.pntd.0009360), 2021-09-30
Supplement: pntd.0009360.s026.pdf [file pntd.0009360.s026.pdf]

**S26 Appendix. QDa mass spectrometer results**

Table S26 A. QDa mass spectrometer detailed performance breakdown..... 1

Table S26 B. QDa mass spectrometer evaluation summary. .... 2

**Table S26 A. QDa mass spectrometer detailed performance breakdown.**

| <u>Samples</u>                                  | <b>Good quality samples available for specificity calculation: n=24</b> |                                 |                                               |                                                |
|-------------------------------------------------|-------------------------------------------------------------------------|---------------------------------|-----------------------------------------------|------------------------------------------------|
|                                                 | <u>0% and wrong API samples<br/>(n=19)</u>                              |                                 | <u>50% and 80%<br/>API samples<br/>(n=18)</u> | <u>All poor quality<br/>samples<br/>(n=37)</u> |
|                                                 | <b>Sensitivity<br/>(95% CI)</b>                                         | <b>Specificity<br/>(95% CI)</b> | <b>Sensitivity<br/>(95% CI)</b>               | <b>Sensitivity<br/>(95% CI)</b>                |
| <i>Total, not through packaging<br/>(n=105)</i> | 100 (93.3-100)                                                          | 91.7 (73.0-99.0)                | 100 (91.6-100)                                | 100 (96.2-100)                                 |
| <i>Antimalarials<br/>(n=51)</i>                 | 100 (87.7-100)                                                          | 80.0 (28.4-99.5)                | 100 (81.5-100)                                | 100 (92.3-100)                                 |
| AMLN (n=24)                                     | 100 (79.4-100)                                                          | 100 (15.8-100)                  | 100 (54.1-100)                                | 100 (84.6-100)                                 |
| ART (n=14)                                      | 100 (54.1-100)                                                          | 50 (1.3-98.7)                   | 100 (54.1-100)                                | 100 (73.5-100)                                 |
| DHAP (n=13)                                     | 100 (54.1-100)                                                          | 100 (2.5-100)                   | 100 (54.1-100)                                | 100 (73.5-100)                                 |
| <i>Antibiotics (n=68)</i>                       | 100 (86.3-100)                                                          | 94.7 (74-99.9)                  | 100 (85.8-100)                                | 100 (92.7-100)                                 |
| ACA (n=15)                                      | 100 (54.1-100)                                                          | 100 (29.2-100)                  | 100 (54.1-100)                                | 100 (73.5-100)                                 |
| AZITH (n=16)                                    | 100 (54.1-100)                                                          | 100 (39.8-100)                  | 100 (54.1-100)                                | 100 (73.5-100)                                 |
| OFLO (n=19)                                     | 100 (54.1-100)                                                          | 85.7 (42.1-99.6)                | 100 (54.1-100)                                | 100 (73.5-100)                                 |
| SMTM (n=18)                                     | 100 (59.0-100)                                                          | 100 (47.8-100)                  | 100 (54.1-100)                                | 100 (75.3-100)                                 |

**Table S26 B. QDa mass spectrometer evaluation summary.**

|                                            | <u>Samples</u>                                                                                                                                                                                                                                                                                                                                                                                                                                                                                                                                                                                         | <u>Sensitivity</u><br><u>(95% CI)*</u> | <u>Specificity</u><br><u>(95% CI)*</u> | <u>Comments</u> |
|--------------------------------------------|--------------------------------------------------------------------------------------------------------------------------------------------------------------------------------------------------------------------------------------------------------------------------------------------------------------------------------------------------------------------------------------------------------------------------------------------------------------------------------------------------------------------------------------------------------------------------------------------------------|----------------------------------------|----------------------------------------|-----------------|
| <b>Sensitivity and Specificity Results</b> | <i>0% and wrong API</i>                                                                                                                                                                                                                                                                                                                                                                                                                                                                                                                                                                                | 100 (93.3-100)                         | 91.7 (73.0-99.0)                       | N/A             |
|                                            | <i>50% and 80% API</i>                                                                                                                                                                                                                                                                                                                                                                                                                                                                                                                                                                                 | 100 (91.6-100)                         |                                        |                 |
|                                            | <i>All poor-quality samples</i>                                                                                                                                                                                                                                                                                                                                                                                                                                                                                                                                                                        | 100 (96.2-100)                         |                                        |                 |
| <b>Strengths and Limitations</b>           | <p><i>Strengths:</i></p> <ul style="list-style-type: none"> <li>-High accuracy in identifying samples with no or wrong API.</li> <li>- Correct identification of all 50% and 80% API medicines, with possibility of quantitation of API.</li> </ul> <p><i>Limitations:</i></p> <ul style="list-style-type: none"> <li>-Many consumable requirements include the need for a nitrogen-gas source.</li> <li>-Sample preparation required to obtain concentrations dilute enough to be within the quantitative range of the instrument.</li> <li>-Higher complexity and higher cost instrument.</li> </ul> |                                        |                                        |                 |
| <b>User Satisfaction</b>                   | <p><i>Plus:</i></p> <p>Highest sensitivity and specificity quantitative instrument tested with many other types of experiments possible.</p> <p><i>Minus:</i></p> <p>Intensive operation and set-up; chemicals and gases required; requires more experienced users.</p>                                                                                                                                                                                                                                                                                                                                |                                        |                                        |                 |
| <b>Comparative Evaluation</b>              | <p>No significant differences in sensitivity compared to other devices to identify 0% and wrong API samples and lower specificity than all other devices except the C-Vue.</p>                                                                                                                                                                                                                                                                                                                                                                                                                         |                                        |                                        |                 |

\* Sensitivity and specificity for quality assessment of the dosage unit not through the packaging.
