# Supplementary material for: Laboratory evaluation of twelve portable devices for medicine quality screening
Source: PubMed Central journal article supplement (PMC8483346; doi:10.1371/journal.pntd.0009360), 2021-09-30
Supplement: pntd.0009360.s027.pdf [file pntd.0009360.s027.pdf]

1 **S27 Appendix. Pair-wise analysis**  
2  
3 Table S27 A. Pair-wise sensitivity comparisons of the devices used to test 0% and wrong API samples  
4 outside of their packaging. .... 2  
5 Table S27 B. Pair-wise specificity comparisons of the devices used to test genuine samples outside their  
6 packaging..... 3  
7 Table S27 C. Pair-wise sensitivity comparisons of the devices used to test 50 % and 80 % API samples  
8 outside their packaging. .... 4  
9  
10

**Table S27 A. Pair-wise sensitivity comparisons of the devices used to test 0% and wrong API samples outside of their packaging.** Sensitivities expressed as 95% CI, in grey. The p-value of the McNemar test (n=number of 0%/wrong API medicines assessed by both devices in the pair) is presented. The pairs for which a significant difference was observed are shown in orange, if any.

|                | 4500a FTIR        | C-Vue             | MicroPHAZIR RX    | Minilab           | Neospectra 2.5    | NIR-S-G1            | PADs              | PharmaChk         | Progeny           | QDa               | TruScan RM        | RDT               |
|----------------|-------------------|-------------------|-------------------|-------------------|-------------------|---------------------|-------------------|-------------------|-------------------|-------------------|-------------------|-------------------|
| 4500a FTIR     | 100<br>(93.3-100) |                   |                   |                   |                   |                     |                   |                   |                   |                   |                   |                   |
| C-Vue          | 1<br>(n=19)       | 100<br>(82.4-100) |                   |                   |                   |                     |                   |                   |                   |                   |                   |                   |
| MicroPHAZIR RX | 1<br>(n=47)       | 1<br>(n=19)       | 100<br>(92.5-100) |                   |                   |                     |                   |                   |                   |                   |                   |                   |
| Minilab        | 1<br>(n=53)       | 1<br>(n=19)       | 1<br>(n=47)       | 100<br>(93.3-100) |                   |                     |                   |                   |                   |                   |                   |                   |
| Neospectra 2.5 | 1<br>(n=47)       | 1<br>(n=19)       | 1<br>(n=47)       | 1<br>(n=47)       | 100<br>(92.5-100) |                     |                   |                   |                   |                   |                   |                   |
| NIR-S-G1       | 0.1250<br>(n=47)  | 0.2500<br>(n=19)  | 0.1250<br>(n=47)  | 1<br>(n=47)       | 0.1250<br>(n=47)  | 91.5<br>(79.6-97.6) |                   |                   |                   |                   |                   |                   |
| PADs           | 1<br>(n=31)       | 1<br>(n=19)       | 1<br>(n=31)       | 1<br>(n=31)       | 1<br>(n=31)       | 0.1250<br>(n=31)    | 100<br>(88.8-100) |                   |                   |                   |                   |                   |
| PharmaChk      | 1<br>(n=6)        | N/A               | N/A               | 1<br>(n=6)        | N/A               | N/A                 | N/A               | 100<br>(54.1-100) |                   |                   |                   |                   |
| Progeny        | 1<br>(n=47)       | 1<br>(n=19)       | 1<br>(n=47)       | 1<br>(n=47)       | 1<br>(n=47)       | 0.1250<br>(n=47)    | 1<br>(n=31)       | N/A               | 100<br>(92.5-100) |                   |                   |                   |
| QDa            | 1<br>(n=47)       | 1<br>(n=19)       | 1<br>(n=47)       | 1<br>(n=53)       | 1<br>(n=47)       | 0.1250<br>(n=47)    | 1<br>(n=31)       | 1<br>(n=6)        | 1<br>(n=47)       | 100<br>(93.3-100) |                   |                   |
| TruScan RM     | 1<br>(n=47)       | 1<br>(n=19)       | 1<br>(n=47)       | 1<br>(n=47)       | 1<br>(n=47)       | 0.1250<br>(n=47)    | 1<br>(n=31)       | N/A               | 1<br>(n=47)       | 1<br>(n=47)       | 100<br>(92.5-100) |                   |
| RDT            | 1<br>(n=12)       | N/A               | 1<br>(n=6)        | 1<br>(n=6)        | 1<br>(n=6)        | 1<br>(n=6)          | 1<br>(n=6)        | 1<br>(n=6)        | 1<br>(n=6)        | 1<br>(n=6)        | 1<br>(n=6)        | 100<br>(73.5-100) |

**Table S27 B. Pair-wise specificity comparisons of the devices used to test genuine samples outside their packaging.**

Specificities expressed as 95% CI, in grey. The p-value of the McNemar test (n=number of 0%/wrong API medicines assessed by both devices in the pair) is presented. The pairs for which a significant difference was observed are shown in orange, if any.

|                | 4500a FTIR              | C-Vue                   | MicroPHAZIR RX    | Minilab           | Neospectra 2.5    | NIR-S-G1          | PADs              | PharmaChk        | Progeny             | QDa                 | TruScan RM        | RDT               |
|----------------|-------------------------|-------------------------|-------------------|-------------------|-------------------|-------------------|-------------------|------------------|---------------------|---------------------|-------------------|-------------------|
| 4500a FTIR     | 100<br>(85.8-100)       |                         |                   |                   |                   |                   |                   |                  |                     |                     |                   |                   |
| C-Vue          | <b>0.0313</b><br>(n=15) | 60<br>(32.3-83.7)       |                   |                   |                   |                   |                   |                  |                     |                     |                   |                   |
| MicroPHAZIR RX | 1<br>(n=22)             | <b>0.0313</b><br>(n=15) | 100<br>(84.6-100) |                   |                   |                   |                   |                  |                     |                     |                   |                   |
| Minilab        | 1<br>(n=24)             | <b>0.0313</b><br>(n=15) | 1<br>(n=22)       | 100<br>(85.8-100) |                   |                   |                   |                  |                     |                     |                   |                   |
| Neospectra 2.5 | 1<br>(n=22)             | <b>0.0313</b><br>(n=15) | 1<br>(n=22)       | 1<br>(n=22)       | 100<br>(84.6-100) |                   |                   |                  |                     |                     |                   |                   |
| NIR-S-G1       | 1<br>(n=22)             | <b>0.0313</b><br>(n=15) | 1<br>(n=22)       | 1<br>(n=22)       | 1<br>(n=22)       | 100<br>(84.6-100) |                   |                  |                     |                     |                   |                   |
| PADs           | 1<br>(n=20)             | <b>0.0313</b><br>(n=15) | 1<br>(n=20)       | 1<br>(n=20)       | 1<br>(n=20)       | 1<br>(n=20)       | 100<br>(83.2-100) |                  |                     |                     |                   |                   |
| PharmaChk      | 1<br>(n=2)              | N/A                     | N/A               | 1<br>(n=2)        | N/A               | N/A               | N/A               | 50<br>(1.3-98.7) |                     |                     |                   |                   |
| Progeny        | 1<br>(n=22)             | 0.0625<br>(n=15)        | 1<br>(n=22)       | 1<br>(n=22)       | 1<br>(n=22)       | 1<br>(n=22)       | 1<br>(n=20)       | N/A              | 95.5<br>(77.2-99.9) |                     |                   |                   |
| QDa            | 1<br>(n=22)             | 0.1250<br>(n=15)        | 1<br>(n=22)       | 0.50<br>(n=24)    | 1<br>(n=22)       | 1<br>(n=22)       | 1<br>(n=20)       | 1<br>(n=2)       | 1<br>(n=22)         | 91.7<br>(73.0-99.0) |                   |                   |
| TruScan RM     | 1<br>(n=22)             | <b>0.0313</b><br>(n=15) | 1<br>(n=22)       | 1<br>(n=22)       | 1<br>(n=22)       | 1<br>(n=22)       | 1<br>(n=20)       | N/A              | 1<br>(n=22)         | 1<br>(n=22)         | 100<br>(84.6-100) |                   |
| RDT            | 1<br>(n=3)              | N/A                     | 1<br>(n=1)        | 1<br>(n=3)        | 1<br>(n=1)        | 1<br>(n=1)        | 1<br>(n=1)        | 1<br>(n=2)       | 1<br>(n=1)          | 1<br>(n=3)          | 1<br>(n=1)        | 100<br>(29.2-100) |

**Table S27 C. Pair-wise sensitivity comparisons of the devices used to test 50 % and 80 % API samples outside their packaging.**

Sensitivities expressed as 95% CI, in grey. The p-value of the McNemar test (n=number of 0%/wrong API medicines assessed by both devices in the pair) is presented. The pairs for which a significant difference was observed are shown in orange, if any.

|                | 4500a FTIR                  | C-Vue                       | MicroPHAZIR RX              | Minilab                     | Neospectra 2.5              | NIR-S-G1                    | PADs                        | PharmaChk           | Progeny                     | QDa                         | TruScan RM          | RDT                |
|----------------|-----------------------------|-----------------------------|-----------------------------|-----------------------------|-----------------------------|-----------------------------|-----------------------------|---------------------|-----------------------------|-----------------------------|---------------------|--------------------|
| 4500a FTIR     | 28.6<br>(15.7-44.6)         |                             |                             |                             |                             |                             |                             |                     |                             |                             |                     |                    |
| C-Vue          | <b>0.0005</b><br>(n=18)     | 100<br>(81.5-100)           |                             |                             |                             |                             |                             |                     |                             |                             |                     |                    |
| MicroPHAZIR RX | <b>0.0078</b><br>(n=36)     | <b>0.0039</b><br>(n=18)     | 50.0<br>(32.9-67.1)         |                             |                             |                             |                             |                     |                             |                             |                     |                    |
| Minilab        | <b>0.0002</b><br>(n=42)     | <b>0.0156</b><br>(n=18)     | 0.6250<br>(n=36)            | 59.5<br>(43.3-74.4)         |                             |                             |                             |                     |                             |                             |                     |                    |
| Neospectra 2.5 | <b>0.0215</b><br>(n=36)     | <b>&lt;0.0001</b><br>(n=18) | <b>&lt;0.0001</b><br>(n=36) | <b>&lt;0.0001</b><br>(n=36) | 5.6<br>(0.7-18.7)           |                             |                             |                     |                             |                             |                     |                    |
| NIR-S-G1       | 1<br>(n=36)                 | <b>0.0010</b><br>(n=18)     | 0.0923<br>(n=36)            | <b>0.0352</b><br>(n=36)     | <b>0.0117</b><br>(n=36)     | 30.6<br>(16.3-48.1)         |                             |                     |                             |                             |                     |                    |
| PADs           | <b>0.0078</b><br>(n=30)     | <b>&lt;0.0001</b><br>(n=18) | <b>0.0001</b><br>(n=30)     | <b>&lt;0.0001</b><br>(n=30) | 0.5000<br>(n=30)            | <b>0.0039</b><br>(n=30)     | 0<br>(0-11.6)               |                     |                             |                             |                     |                    |
| PharmaChk      | 0.2500 (n=6)                | N/A                         | N/A                         | 1<br>(n=6)                  | N/A                         | N/A                         | N/A                         | 83.3<br>(35.9-99.6) |                             |                             |                     |                    |
| Progeny        | 0.3438<br>(n=36)            | <b>0.0001</b><br>(n=18)     | <b>0.0005</b><br>(n=36)     | <b>0.0001</b><br>(n=36)     | 0.2188<br>(n=36)            | 0.1797<br>(n=36)            | <b>0.0313</b><br>(n=30)     | N/A                 | 16.7<br>(6.4-32.8)          |                             |                     |                    |
| QDa            | <b>&lt;0.0001</b><br>(n=36) | 1<br>(n=18)                 | <b>&lt;0.0001</b><br>(n=36) | <b>&lt;0.0001</b><br>(n=42) | <b>&lt;0.0001</b><br>(n=36) | <b>&lt;0.0001</b><br>(n=36) | <b>&lt;0.0001</b><br>(n=30) | 1<br>(n=6)          | <b>&lt;0.0001</b><br>(n=36) | 100<br>(91.6-100)           |                     |                    |
| TruScan RM     | 0.8036<br>(n=36)            | <b>&lt;0.0001</b><br>(n=18) | <b>0.0213</b><br>(n=36)     | <b>0.0118</b><br>(n=36)     | <b>0.0313</b><br>(n=36)     | 0.6072<br>(n=36)            | <b>0.0078</b><br>(n=30)     | N/A                 | 0.7539<br>(n=36)            | <b>&lt;0.0001</b><br>(n=36) | 22.2<br>(10.1-39.2) |                    |
| RDT            | 0.6250<br>(n=12)            | N/A                         | 0.2500<br>(n=6)             | <b>0.0313</b><br>(n=12)     | 0.5000 (n=6)                | 0.5000 (n=6)                | 1<br>(n=6)                  | 0.25<br>(n=6)       | 1<br>(n=6)                  | <b>0.0020</b><br>(n=12)     | 0.0625 (n=6)        | 16.7<br>(2.1-48.4) |
