# Supplementary material for: Laboratory evaluation of twelve portable devices for medicine quality screening
Source: PubMed Central journal article supplement (PMC8483346; doi:10.1371/journal.pntd.0009360), 2021-09-30
Supplement: pntd.0009360.s028.pdf [file pntd.0009360.s028.pdf]

**S28 Appendix. Table describing the degree of difficulty to analyse other, less common, medicine formulations relative to the analysis of a tablet.**

| <u><b>Instrument</b></u>  | <i>Medicine formulation</i> |                                        |                      |                           |
|---------------------------|-----------------------------|----------------------------------------|----------------------|---------------------------|
|                           | <u><b>Capsule</b></u>       | <u><b>Liquid<br/>(water based)</b></u> | <u><b>Powder</b></u> | <u><b>Creams/Gels</b></u> |
| <i>4500a FTIR</i>         | Same                        | Higher                                 | Easier               | Higher                    |
| <i>C-Vue</i>              | Same                        | Easier                                 | Easier               | Medium                    |
| <i>MicroPHAZIR<br/>RX</i> | Medium                      | Higher                                 | Same                 | Higher                    |
| <i>Minilab</i>            | Same                        | Easier                                 | Easier               | Medium                    |
| <i>Neospectra 2.5</i>     | Medium                      | Higher                                 | Same                 | Higher                    |
| <i>NIRscan</i>            | Medium                      | Higher                                 | Same                 | Higher                    |
| <i>PADs</i>               | Same                        | Higher                                 | Easier               | Higher                    |
| <i>PharmaChk</i>          | Same                        | Easier                                 | Easier               | Medium                    |
| <i>Progeny</i>            | Medium                      | Higher                                 | Same                 | Higher                    |
| <i>RDTs</i>               | Same                        | Easier                                 | Easier               | Medium                    |
| <i>Truscan RM</i>         | Medium                      | Higher                                 | Same                 | Higher                    |
| <i>QDa</i>                | Same                        | Easier                                 | Easier               | Medium                    |
