# Supplementary material for: Laboratory evaluation of twelve portable devices for medicine quality screening
Source: PubMed Central journal article supplement (PMC8483346; doi:10.1371/journal.pntd.0009360), 2021-09-30
Supplement: pntd.0009360.s029.pdf [file pntd.0009360.s029.pdf]

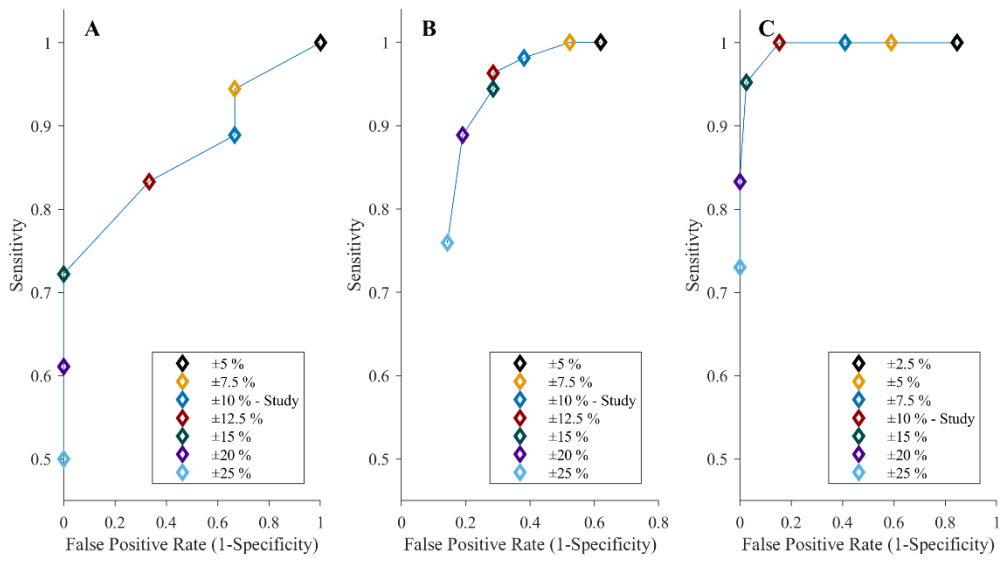

**S29 Appendix. Receiver operating characteristic (ROC) curves for quantitative devices.**

ROC curves for the (A) PharmaChk microfluidic system, (B) C-Vue liquid chromatograph, and (C) QDa mass spectrometer for all simulated samples containing 50%, 80% and 100% of the correct API. Each point in the plot corresponds to the threshold concentration that would determine a pass or fail result.
